# Supplementary material for: Bifidobacterium adolescentis CCFM1285 combined with yeast β-glucan alleviates the gut microbiota and metabolic disturbances in mice with antibiotic-associated diarrhea
Source: Royal Society of Chemistry journal article supplement (doi:10.1039/d3fo05421g), 2024-01-01
Supplement: d3fo05421g1.pdf [file d3fo05421g1.pdf]

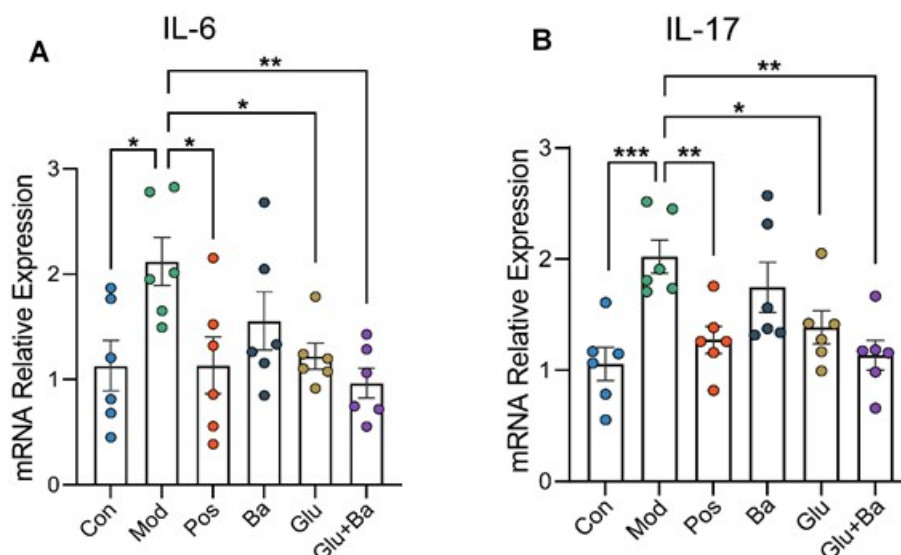

**Figure 1.** Effects of yeast  $\beta$ -glucan and *B. adolescentis* CCFM1285 on the mRNA relative expression of colonic inflammatory factors. Real-time PCR analysis of (A) IL-6 (B) IL-17 mRNA expression. (n=6, \*P < 0.05, \*\*P < 0.01, and \*\*\*P < 0.001.)

Table 1 Primer sequences used for qPCR analysis

| Gene           | Forward (5' to 3')      | Reverse (5' to 3')     |
|----------------|-------------------------|------------------------|
| $\beta$ -actin | CCTAAGAGGAGGATGGTCGC    | CTCAACACCTCAACCCCTC    |
| IL-6           | ACCAGAGGAAATTTTCAATAGGC | TGATGCACTTGCGAGAAAACA  |
| IL-17          | AACGCCGAGGCCAATAACTTTC  | AGGGTCCTCATTGCGGCTCAGA |

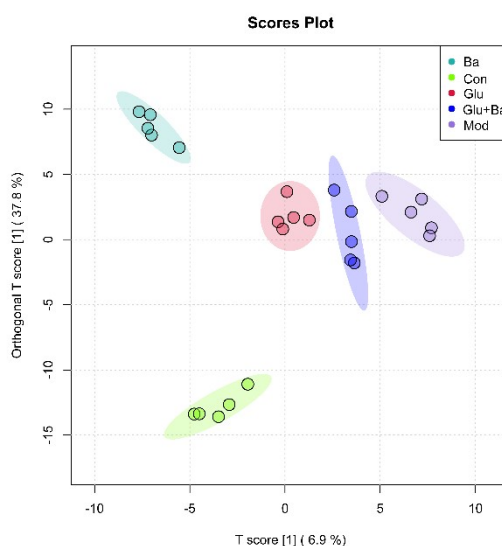

**Figure 2.** Effect of yeast  $\beta$ -glucan and *B. adolescentis* CCFM1285 on the diversity of fecal metabolomics based on OPLS-DA
