# Supplementary material for: Bifidobacterium adolescentis CCFM1285 combined with yeast β-glucan alleviates the gut microbiota and metabolic disturbances in mice with antibiotic-associated diarrhea
Source: Royal Society of Chemistry journal article supplement (doi:10.1039/d3fo05421g), 2024-01-01
Supplement: d3fo05421g2.xlsx [file d3fo05421g2.xlsx]

## Sheet: Feuil1
	Glu+Ba-Mean	Mod-Mean	Which-Max	raw.pval	#NAME?
4-Indolecarbaldehyde	56.427	13.1532	Glu+Ba	8.2105e-07	6.0856
5-Hydroxyindole-3-acetic acid	55.7582	13.0174	Glu+Ba	8.2427e-07	6.0839
5-Methoxyindole	3.58143	0.657123	Glu+Ba	6.938e-08	7.1588
Apigetrin	0.467456	0.0994084	Glu+Ba	0.0030743	2.5123
Chenodeoxycholic Acid	0.0874321	0.0123018	Glu+Ba	0.014597	1.8357
Cholic acid	31.6435	3.90794	Glu+Ba	0.021978	1.658
Deoxycholic acid	8.88432	0.397735	Glu+Ba	0.00017275	3.7626
Gentisic acid	1.68315	0.264382	Glu+Ba	0.0083785	2.0768
N-Acetylhistamine	24.5805	5.46345	Glu+Ba	0.00018227	3.7393
Pentadecanoic acid	193.671	16.7737	Glu+Ba	2.7791e-05	4.5561
Salicylic acid	2.37122	0.281704	Glu+Ba	0.00052106	3.2831
Syringic acid	6.27866	1.10193	Glu+Ba	0.041607	1.3808
Xanthurenic acid	0.588039	0.0577923	Glu+Ba	6.3085e-07	6.2001
